# Supplementary figures and images for: Pain in autoimmune inflammatory myopathies: a scoping review
Source: HighWire-hosted journal article supplement (doi:10.1136/rmdopen-2022-002591), 2023-01-01

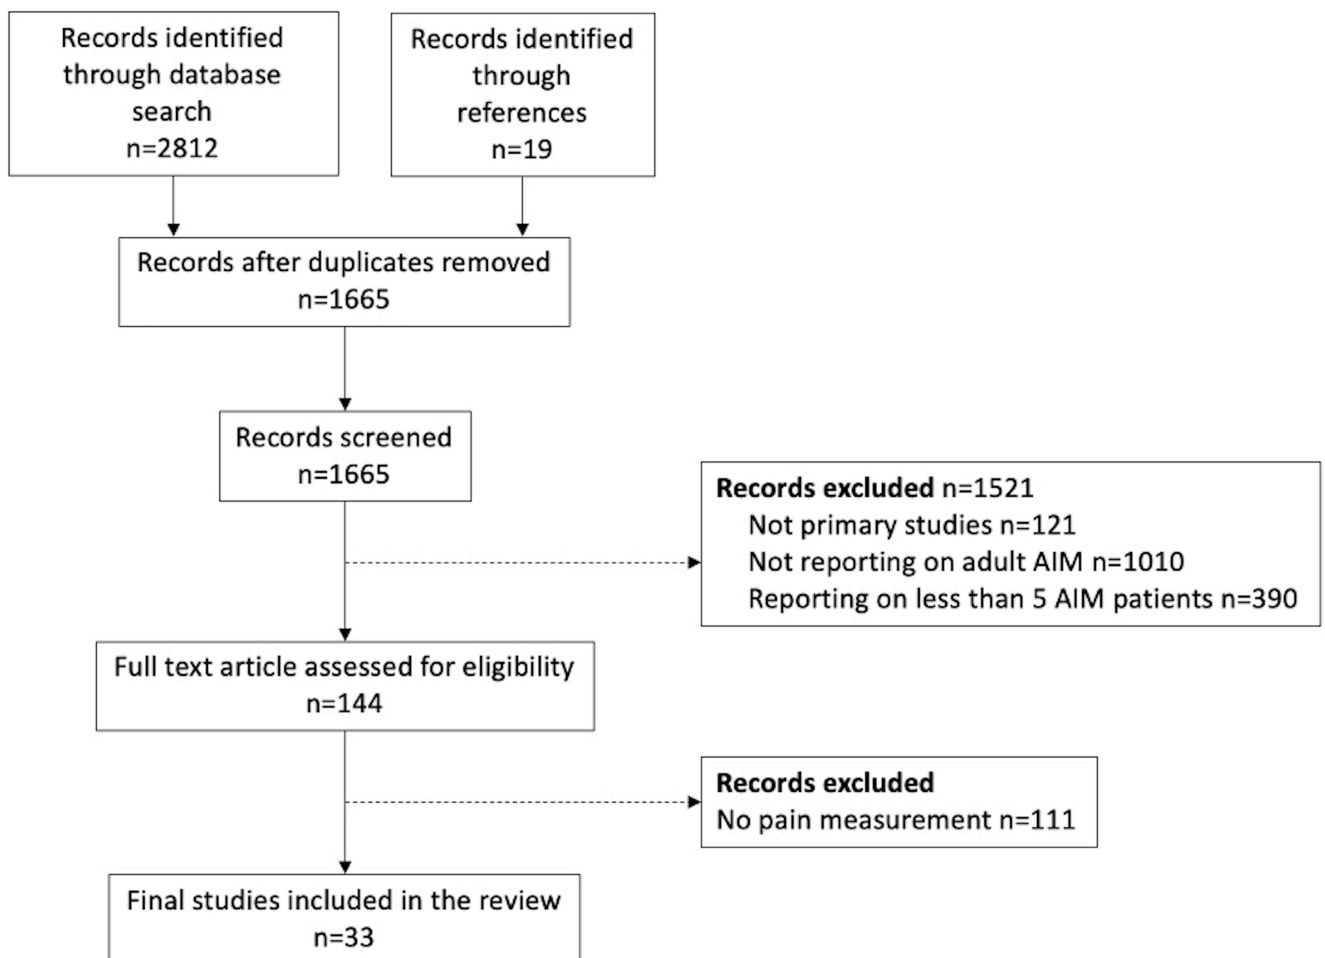

Supplement: rmdopen-2022-002591supp001_data_supplement.pdf [file rmdopen-2022-002591supp001_data_supplement.pdf]
